# Supplementary material for: ChatGPT Demonstrates Potential for Identifying Psychiatric Disorders: Application to Childbirth-Related Post-Traumatic Stress Disorder
Source: Research Square preprint supplement (doi:10.21203/rs.3.rs-3428787/v2), 2024-02-26
Supplement: Supplementary file 1 [file a6357efe292d21275a800125.docx]

Appendix A for Manuscript:

OpenAI’s Narrative Embeddings Can Be Used for Detecting Post-Traumatic Stress Following Childbirth Via Birth Stories

Alon Bartal1*, Kathleen M. Jagodnik1,2,3, Sabrina J. Chan2, Sharon Dekel2,3*

1The School of Business Administration, Bar-Ilan University, Max and Anna Web, Ramat Gan, 5290002, Israel.

2Department of Psychiatry, Massachusetts General Hospital, 55 Fruit St., Boston, 02114, Massachusetts, USA.

3Department of Psychiatry, Harvard Medical School, 25 Shattuck St., Boston, 02115, Massachusetts, USA.

*Corresponding author(s). E-mail(s): alon.bartal@biu.ac.il; sdekel@mgh.harvard.edu;

Contributing authors: kathleen.jagodnik@biu.ac.il; sabrina chan@dfci.harvard.edu

**Appendix Figure Caption:**

**Figure A1.** The modeling approach for classifying pairs of narratives associated with women with or without CB-PTSD.

# Appendix A Steps to Build and Test Model #3 of This Study

The following four steps describe how we built and tested Model #3:

**Step 1. Define a PCL-5 cutoff score.** We labeled each narrative as Class 1: Probable CB-PTSD (‘CB-PTSD’) based on PCL-5 *≥* 31, or Class 0: No Probable CB-PTSD (‘No CB-PTSD’) based on PCL-5 *<* 31.

**Step 2. Data preparation.** We discarded narratives with *<* 30 words from the dataset [47,48]. To handle the imbalance in the analyzed dataset (due to the small representation of cases with PCL-5 *≥* 31), we randomly sampled the majority Class 0 to fit the size of the minority Class 1. Using the balanced dataset, we randomly selected 70% of the narratives to train our model and 30% to test our model. This step was repeated 10 times.

**Step 3. Develop a Machine Learning (ML) classifier that utilizes Natural Language Processing (NLP) features.** Using the Train set, we develop a model that analyzes pairwise narrative (sentence) data. The goal of the developed model is to learn how to identify semantically or contextually similar pairs of sentences. First, each sentence (*Si*) is mapped onto a fixed-size embedding vector using the text-embedding-ada-002 model via OpenAI API, which we denote *emb*(*Si*). Thus, *Si* is encoded to a vector using a function *emb*(*Si*). To learn if two sentences are semantically or contextually similar, we train a classifier to analyze their Hadamard

product (denoted: *◦*) [54] and decide whether they affiliate with the same class or not. Given a sentence *Sa* not present during training, a sentence *S*1 *∈* Class 1, and a sentence *S*0 *∈* Class 0, then *Sa ∈* Class 1 if the probability of Class 1 affiliation when applying our developed model to the Hadamard product *emb*(*Sa*) *◦ emb*(*S*1) is

higher than the probability of Class 0 affiliation when applying our developed model to *emb*(*Sa*) *◦ emb*(*S*0).

This approach allowed us to generate multiple training examples since there are *n*(*n −* 1)*/*2 possible combinations for *n* sentences, thus addressing the challenge of training an ML model with a low number of examples, as in Class 1. More specifically, the following three substeps describe the model development.

1. Each pair of sentences in Class 1, and each pair of sentences in Class 0, were labeled as positive examples, indicating semantically or contextually similar sentences of individuals with (Set #1) or without (Set #2) CB-PTSD, respectively. Next, negative examples (Set #3) of the same size as the positive examples sets

(*||*Set #1*||* + *||*Set #2*||*) were created by randomly selecting pairs of sentences, one

from Class 1, and the other from Class 0, indicating semantically or contextually

nonsimilar sentences.

1. Using the text-embedding-ada-002 model, each sentence was mapped into a dense vector space. Then, for each Set #1 to #3, we computed a vector *z* of the embedding

(*emb*) of each pair of sentences (*u, v*), selected in Substep 1, *z* = (*emb*(*u*) *◦emb*(*v*)).

1. A densely connected feedforward neural network (DFNN) was trained to classify

pairs of sentences (by processing vector *z*) as semantically similar or not.

**Step 4. Test model performance.** We compared the performance of Model #3 with the model in [47], as well as with Model #1 and Model #2. We report the area under the receiver operating characteristic curve (AUC), F1 score, Sensitivity, and Specificity measures on the Test set. To test Model #3 on a newly unseen narrative *S* in the Test set, we first compute its embeddings. Next, we calculate the average embedding vector (*vn*) of all Train narratives in Class 0, and the average embedding vector (*vp*) of all Train narratives in Class 1. To decide the class of S, we compute

*zn* = (*emb*(*S*) *◦ vn*), and *zp* = (*emb*(*S*) *◦ vp*). Then, we apply Model #3 (denoted as

*f* (*x*)) to *zn* and *zp*, and compare its output, i.e., compare the likelihood of similarity

of *emb*(*S*) to *vp* with the likelihood of similarity of *emb*(*S*) to *vn*. If *f* (*zp*) *> f* (*zn*), we say that *S ∈* Class 1, else *S ∈* Class 0. Intuitively, our model should assign a higher likelihood of similarity between an embedded narrative of a woman with CB-PTSD

to the vector *vp* than to the vector *vn*.

[Insert_FigureA1_Here]
