# Supplementary figures and images for: ChatGPT Demonstrates Potential for Identifying Psychiatric Disorders: Application to Childbirth-Related Post-Traumatic Stress Disorder
Source: Research Square preprint supplement (doi:10.21203/rs.3.rs-3428787/v2), 2024-02-26

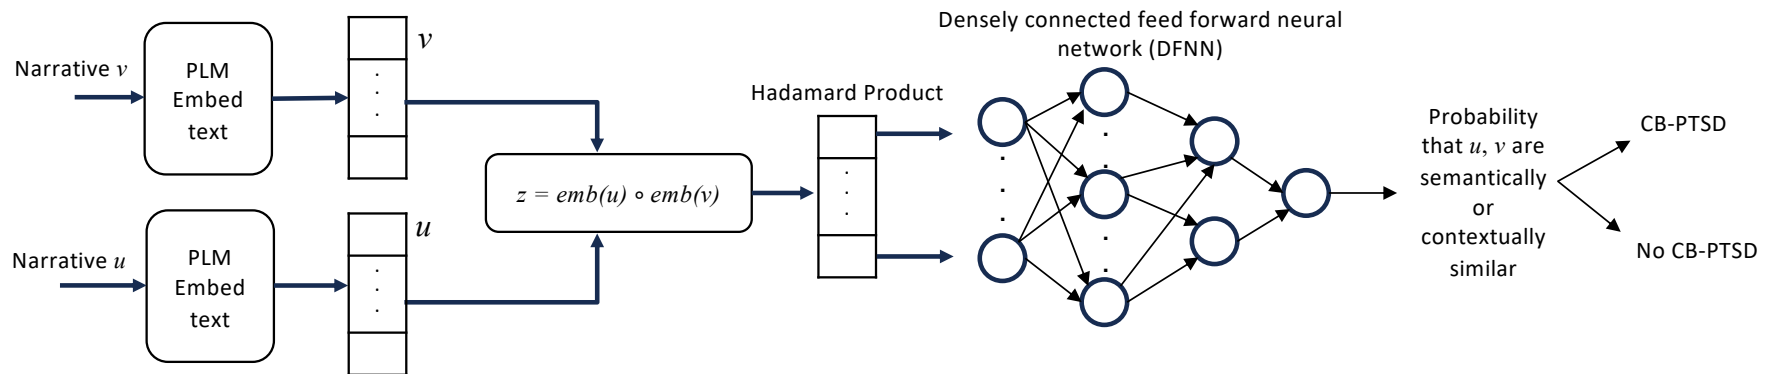

Supplement: Supplementary file 1 [file cfdc42c206f1c5d2cd8ce378.pdf]
